1 **Do clinical investigations predict long-term outcome?**  
2 **A follow-up of paediatric respiratory outpatients**

3

4 Carmen CM. de Jong<sup>1</sup>, Eva SL. Pedersen<sup>1</sup>, Myrofora Goutaki<sup>1</sup>, Daniel Trachsel<sup>3</sup>, Juerg  
5 Barben<sup>4</sup>, Claudia E. Kuehni<sup>1,2</sup>

6

7 <sup>1</sup> Institute of Social and Preventive Medicine, University of Bern, Bern, Switzerland

8 <sup>2</sup> Children's University Hospital of Bern, University of Bern, Bern, Switzerland

9 <sup>3</sup> Paediatric Respiratory Medicine, Children's University Hospital of Basel, Basel, Switzerland

10 <sup>4</sup> Paediatric Respiratory Medicine, Children's Hospital of Eastern Switzerland, St. Gallen,  
11 Switzerland

12

13

14

15

16 **Running title: Predicting wheeze: a follow-up study** (max. 100 characters)

17

18

19

20

21

22

23

24

25

26 **Correspondence to**

27 Claudia E. Kuehni

28 Institute of Social and Preventive Medicine

29 Mittelstrasse 43, CH-3012 Bern, Switzerland

30 Tel.: +41 (0)31 631 35 07

31 E-mail: [claudia.kuehni@ispm.unibe.ch](mailto:claudia.kuehni@ispm.unibe.ch)

32

33 **Number of figures and tables: 5**

34

35 **Material in the electronic repository: 2 tables and 2 figures**

36

37

## 38 **Do clinical investigations predict long-term outcome?**

### 39 **A follow-up of paediatric respiratory outpatients**

40 de Jong CCM, Pedersen ESL, Goutaki M, Trachsel M, Barben J, Kuehni CE

41

#### 42 **Abstract (250/300)**

43 **Introduction:** The contribution of clinical investigations to prediction of long-term outcomes  
44 of children investigated for asthma is unclear.

45 **Aim:** We performed a broad range of clinical tests and investigated whether they helped to  
46 predict long-term wheeze among children referred for evaluation of possible asthma.

47 **Methods:** We studied children aged 6-16 years referred to two Swiss pulmonary outpatient  
48 clinics with a history of wheeze, dyspnoea, or cough in 2007. The initial assessment included  
49 spirometry, body plethysmography, fractional exhaled nitric oxide, skin prick tests, and  
50 bronchial provocation tests (BPT) by exercise, methacholine, and mannitol. Respiratory  
51 symptoms were assessed with questionnaires at baseline and at follow-up seven years later.  
52 Associations between baseline factors and wheeze at follow-up were investigated by logistic  
53 regression.

54 **Results:** At baseline, 111 children were examined in 2007. Seven years after baseline, 85  
55 (77%) completed the follow-up questionnaire, among whom 61 (72%) had wheeze at  
56 baseline, while at follow-up 39 (46%) reported wheeze. Adjusting for age and sex, the  
57 following characteristics predicted wheeze at adolescence: wheeze triggered by pets (odds  
58 ratio 4.2, 95% CI 1.2-14.8), pollen (2.8, 1.1-7.0), and exercise (3.1, 1.2-8.0). Of the clinical  
59 tests, only a positive exercise test (3.2, 1.1-9.7) predicted wheeze at adolescence.

60 **Conclusion:** Reported exercise-induced wheeze and wheeze triggered by pets or pollen  
61 were important predictors of wheeze persistence into adolescence. None of the clinical tests  
62 predicted wheeze more strongly than reported symptoms. Clinical tests might be important  
63 for asthma diagnosis but medical history is more helpful in predicting prognosis in children  
64 referred for asthma.

65 **Key words:** Asthma, cohort, epidemiology, prognosis, respiratory, wheeze

66

## 67 **Introduction**

68 Asthma is the most prevalent chronic respiratory disease in childhood and adolescence,  
69 which leads to many health care visits.(1-3) Its key symptoms are wheeze, cough, and  
70 difficulty breathing, but symptoms vary substantially between individuals and across ages.(1,  
71 2) Some children who present with asthma symptoms continue to have problems later in life,  
72 while others do not. Better knowledge of their individual prognoses might affect their follow-  
73 up and answer questions of parents in the clinics.(4-6) Assessing prognosis of asthma  
74 symptoms from school age into adulthood and identifying children at high-risk of symptom  
75 persistence is challenging.(4)

76 Studies investigating prognosis of asthma or wheeze in school-aged children are conducted  
77 with either clinical asthma cohorts or symptomatic children of a population-based cohort.(7)  
78 Studies in clinical asthma cohorts have found that lower FEV1, asthma severity, sensitisation  
79 to indoor allergens, eczema, hay fever, skin test reactivity, and bronchial hyper-  
80 responsiveness were associated with asthma persistence.(8-10) Studies in population-based  
81 cohorts have found that wheeze persistence was predicted by frequent attacks of wheeze,  
82 female sex, sensitization to furred animals or house dust mites, rhinitis, and bronchial hyper-  
83 responsiveness.(11-16)

84 For clinical practice, two knowledge gaps remain. First, few studies have examined the  
85 prediction of long-term prognosis, but none have done this for school-aged children seen in  
86 outpatient clinics for possible asthma. Second, many tests are performed in clinics to  
87 diagnose these children, but it is unclear whether these tests predict prognosis more  
88 accurately than reported symptoms alone. We determined whether clinical tests in addition  
89 to reported symptoms help predict wheeze in adolescence in school-aged children referred  
90 for possible asthma.

91

## 92 **Methods**

### 93 **Study population and study design**

94 Of the 124 children invited, 111 were recruited from the respiratory outpatient clinics of two  
95 paediatric hospitals in Switzerland, 84 from St. Gallen and 27 from Basel, who were eligible  
96 if they had been referred for evaluation of current wheeze, dyspnoea, or cough. Children  
97 with a known chronic respiratory disease such as cystic fibrosis or primary ciliary dyskinesia,  
98 or a respiratory tract infection during four weeks prior to the visit were excluded. At baseline  
99 in 2007-2008, parents completed a questionnaire and children underwent a set of  
100 standardised clinical tests during two different visits within one week as part of the study  
101 protocol.(17, 18) At follow-up seven years after baseline, in 2014 to 2015, we sent a  
102 questionnaire to the 12-23 year-old adolescents or young adults (from now on referred to as  
103 adolescents) (Figure S2).  
104 Ethical approval was obtained from the local Ethics committee and all parents gave informed  
105 consent at baseline (EKSG 07/001).

106

#### 107 **Baseline assessment**

108 The parental questionnaire included ISAAC key questions(19) plus additional questions on  
109 type and triggers of respiratory symptoms, atopic symptoms, previous treatments and  
110 environmental exposures. The study physician reported clinical test results, final diagnosis,  
111 and prescribed medication in a uniform way.

112 At the initial visit, children underwent performed spirometry, fractional exhaled nitric oxide  
113 (FeNO) measurement, a skin prick test (SPT), bronchial provocation test (BPT) by exercise  
114 and, by methacholine. At the second visit, children did a BPT by mannitol. Spirometry, and  
115 BPT by exercise and methacholine were performed according to published ATS  
116 guidelines.(20) A detailed description of the methodology of the clinical tests performed has  
117 been published elsewhere and is included in the online supplement. Lung function  
118 measurements were compared to reference values from Zapletal et al.(21) Details of the  
119 clinical tests are published elsewhere.(17) We considered the exercise test as positive in the  
120 event of a  $\geq 15\%$  decrease in the FEV1 after the exercise challenge test, and the  
121 methacholine test as positive when the minimal dose causing a  $\geq 20\%$  decrease of FEV1

122 was <1mg (the provocation dose, PD 20). The mannitol dry powder challenge test was  
123 considered as positive when a 15% fall in FEV1 was measured before a cumulative dose of  
124 635 mg was reached, or when a 10% fall in FEV1 between two doses was reached. FeNO  
125 was measured using the portable NIOX MINO® device, and was considered as positive  
126 when FeNO was higher than 26ppb.(18) We performed skin prick tests for birch, grass,  
127 mugwort, alternaria, cat, house dust mites (D. pteronysinus), and positive and negative  
128 controls.(18) These allergens cover 95% of inhaled allergens in Switzerland.(22) The test  
129 was considered to be positive if any mean wheal diameter was >3mm.

130

### 131 **Assessment at follow-up**

132 The follow-up questionnaire was very similar to the baseline questionnaire, but the questions  
133 were addressed directly to the adolescents instead of their parents.

134

### 135 **Definitions of wheeze and frequent wheeze**

136 We assessed wheeze at follow-up with the question, "Have you had a whistling sound in the  
137 chest in the last 12 months?" If a child had had more than three attacks of wheeze in the last  
138 12 months, we considered the child to have had frequent wheeze.

139

### 140 **Statistical analysis**

141 We compared the participants with information at baseline and follow-up to those without  
142 follow-up information to test for selection bias, using chi-square test. The participants with  
143 information at baseline and follow-up were included in the analysis.

144 We investigated the association between exercise-induced wheeze and a positive exercise  
145 test at baseline using the Fisher's exact test, and the Mann-Whitney-U test when looking at  
146 the association of reported exercise-induced wheeze and the fall of FEV1% predicted during  
147 the exercise test.

148 We investigated the association between symptoms and clinical test results at baseline with  
149 any wheeze and frequent wheeze at follow-up using logistic regression. We included all

150 symptoms from table 1 and clinical tests from table 2 in the model and adjusted for sex and  
 151 age. We did not consider interactions because of the sample size. We used STATA software  
 152 (version 14; College Station, Texas) to analyse the data.

153

## 154 **Results**

### 155 **Characteristics of the study population at baseline and at follow-up**

156 Eighty-five (77%) of the 111 children who participated in the baseline study completed the  
 157 follow-up questionnaire. The median age was 12 years at baseline (range 6-16) and 18 at  
 158 follow-up (12-23); 60% (51/85) were male. Wheeze was reported by 61 (72%) at baseline,  
 159 and 7 reported cough without wheeze and 12 (14%) reported exercise-related breathing  
 160 problems. Among those with wheeze, 27 (44%) had more than three attacks during 12  
 161 months prior to the baseline visit (Table 1). Symptoms at baseline were very similar in  
 162 children who did not take part in the follow-up (Table S1 online supplementary material).  
 163 Asthma medication was prescribed at the baseline visit for 71 (85%) children, of whom 47  
 164 (55%) received inhaled short-acting  $\beta$ 2-agonists (SABA) alone, 6 received SABA and  
 165 inhaled corticosteroids (ICS), and 18 received long-acting  $\beta$ 2-agonists (LABA) and ICS. At  
 166 follow-up, 39 (46%) participants reported wheeze of whom 30 had more than 3 attacks  
 167 during the last year. At follow-up, 44 adolescents (52%) reported using inhalers, including 21  
 168 using SABA alone, 2 using SABA and ICS, and 21 using LABA and ICS (Table 1).

169

170 **Table 1:** Characteristics of the study population at baseline and follow-up (N=85)

|                                        | <b>Baseline</b> |        | <b>Follow-up</b> |         |
|----------------------------------------|-----------------|--------|------------------|---------|
|                                        | 12              | (6-16) | 18               | (12-23) |
| Age, median (range)                    |                 |        |                  |         |
| <b>Respiratory symptoms</b> †, n (%)   |                 |        |                  |         |
| Wheeze                                 | 61              | (72)   | 39               | (46)    |
| More than 3 attacks of wheeze          | 27              | (32)   | 30               | (35)    |
| Exercise-induced wheeze                | 54              | (64)   | 47               | (56)    |
| Disturbed sleep due to wheeze          | 28              | (33)   | 10               | (13)    |
| Difficulty breathing due to wheeze     | 22              | (27)   | 42               | (56)    |
| Limited daily activities due to wheeze | 39              | (46)   | 32               | (38)    |
| Wheeze with colds                      | 36              | (42)   | 29               | (34)    |
| Wheeze without colds                   | 48              | (56)   | 36               | (42)    |
| Wheeze triggers                        |                 |        |                  |         |
| Pollen                                 | 31              | (36)   | 21               | (26)    |

|                                         |    |      |    |      |
|-----------------------------------------|----|------|----|------|
| House dust                              | 15 | (18) | 13 | (16) |
| Pets                                    | 15 | (18) | 16 | (21) |
| Night cough                             | 37 | (44) | 22 | (26) |
| Hay fever                               | 42 | (51) | 46 | (57) |
| Eczema, atopic dermatitis               | 25 | (30) | 18 | (23) |
| <b>Inhaled medication †, n (%)</b>      |    |      |    |      |
| Any                                     | 71 | (85) | 44 | (52) |
| Short-acting $\beta$ 2-agonists, alone  | 47 | (55) | 21 | (25) |
| Short-acting $\beta$ 2-agonists + ICS § | 6  | (7)  | 2  | (2)  |
| Long-acting $\beta$ 2-agonists + ICS §  | 18 | (21) | 21 | (25) |

171 † In the last 12 months

172 ‡ At baseline prescribed medication by the study physician and at follow up self-reported use of medication in  
173 the last 12 months

174 § Inhaled corticosteroids (ICS)

175

176 Table 2 shows the clinical test results and diagnoses at baseline. All tests were completed in  
177 at least 90% of the children. The main reason for not completing a BPT was exhaustion.(17,  
178 18) For the 78 children who completed the BPT by methacholine at baseline, the test was  
179 positive in 76% and the median provocation dose was 0.14mg. Eighty-two completed the  
180 BPT by mannitol, of whom 28% tested positive. The median provocation dose was 635 mg.  
181 Of the 76 children who completed the BPT by exercise, the test was positive in 24% with a  
182 median fall of FEV1 of 8% predicted. SPT was positive in 33 (39%) children and FeNO was  
183 positive in 35 (41%). Doctors diagnosed 62 (73%) children with asthma or episodic viral  
184 wheeze. The other children were mostly diagnosed with cough not due to asthma or vocal  
185 cord dysfunction.

186 At baseline, self-reported exercise-induced wheeze was associated with a positive exercise  
187 test ( $p=0.022$ , table S2). Self-reported exercise-induced wheeze was also associated with  
188 the fall of FEV1% predicted during the exercise test ( $p=0.003$ , figure S1)

189

190 **Table 2.** Results of clinical tests and final diagnosis at baseline

| Clinical test results and diagnosis | Baseline<br>N=85 |            |
|-------------------------------------|------------------|------------|
| <b>Test results</b>                 |                  |            |
| Skin Prick Test, positive n (%)     | 33               | (39)       |
| FeNO test, positive n (%)           | 35               | (41)       |
| Methacholine test (N=78)            |                  |            |
| Positive n (%)                      | 59               | (76)       |
| Provocation dose in mg (IQR) ‡      | 0.14             | (0.07-0.5) |
| Mannitol test (N=82)                |                  |            |
| Positive n (%)                      | 23               | (28)       |

|                                        |     |           |
|----------------------------------------|-----|-----------|
| Provocation dose in mg(IQR) §          | 635 | (547-635) |
| Exercise test (N= 76)                  |     |           |
| Positive n (%)                         | 18  | (24)      |
| Fall FEV1 in % predicted (IQR) †       | 8   | (4-13)    |
| Spirometry % predicted (IQR)           |     |           |
| FEV1                                   | 101 | (91-109)  |
| FVC                                    | 102 | (91-110)  |
| MEF75                                  | 90  | (80-100)  |
| MEF50                                  | 82  | (66-94)   |
| MEF25                                  | 67  | (51-87)   |
| <b>Diagnosis, n (%)</b>                |     |           |
| Asthma or episodic viral wheeze ¶      | 62  | (73)      |
| Cough not due to asthma                | 11  | (13)      |
| Vocal cord dysfunction                 | 7   | (8)       |
| Functional symptoms / hyperventilation | 4   | (5)       |
| Recurrent colds                        | 1   | (1)       |

191 **IQR=inter quartile range** † median (IQR) fall in FEV1 during exercise ‡ median (IQR) provocation dose for a fall  
 192 of ≥ 20% in FEV1 (PD-20) § median (IQR) provocation dose for a fall of ≥ 15% in FEV1 (PD-15) ¶ including  
 193 chronic and exercise related asthma, episodic viral wheeze, and otherwise triggered episodic wheeze  
 194

### 195 **Baseline factors associated with wheeze and frequent wheeze at follow-up**

196 Four respiratory symptoms and one clinical test at baseline were associated with *any*  
 197 *wheeze* at follow-up. Of the reported symptoms, frequent wheeze (>3 attacks) (OR 2.86,  
 198 95% CI 1.10-7.43), exercise-induced wheeze (3.07, 1.19-7.96), wheeze triggered by pets  
 199 (4.22, 1.21-14.76), and wheeze triggered by pollen (2.78, 1.11-6.98) were associated with  
 200 wheeze at follow-up. For the clinical tests, only a positive exercise test was significantly  
 201 associated with wheeze seven years later (3.20, 1.05-9.70). Results remained very similar  
 202 after adjusting for age and sex (Table 3, Fig. 1).

203 Two respiratory symptoms were associated with *frequent wheeze* at follow-up. These were  
 204 exercise-induced wheeze (OR 3.05, 95% CI 1.07-8.67) and wheeze triggered by pets (3.79,  
 205 1.15-12.48; Table 4). None of the clinical test results were associated with frequent wheeze  
 206 at follow-up.

207

208 **Table 3:** Associations between baseline factors and wheeze at follow up

| Baseline factors              | Wheeze ‡<br>at follow-<br>up N=39 | No wheeze<br>at follow-up<br>N=46 | Unadjusted<br>OR (95% CI) | Adjusted §<br>OR (95% CI) |
|-------------------------------|-----------------------------------|-----------------------------------|---------------------------|---------------------------|
| <b>Symptoms †, n(%)</b>       |                                   |                                   |                           |                           |
| Wheeze                        | 31 (79)                           | 30 (65)                           | 2.07 (0.77-5.54)          | 2.23 (0.80-6.21)          |
| More than 3 attacks of wheeze | 17 (44)                           | 10 (22)                           | 2.78 (1.08-7.15)          | 2.86 (1.10-7.43)          |
| Exercise-induced wheeze       | 30 (77)                           | 24 (52)                           | 3.06 (1.19-7.85)          | 3.07 (1.19-7.96)          |
| Disturbed sleep due to wheeze | 16 (41)                           | 12 (26)                           | 1.97 (0.79-4.93)          | 2.23 (0.84-5.96)          |



|                                    |          |          |                  |                  |
|------------------------------------|----------|----------|------------------|------------------|
| Difficulty breathing due to wheeze | 13 (34)  | 9 (20)   | 2.08 (0.77-5.61) | 2.06 (0.76-5.60) |
| Wheeze with colds                  | 18 (46)  | 18 (39)  | 1.33 (0.56-3.16) | 1.41 (0.57-3.49) |
| Wheeze without colds               | 26 (67)  | 22 (48)  | 2.18 (0.90-5.27) | 2.27 (0.92-5.60) |
| Wheeze triggered by allergens      |          |          |                  |                  |
| Pollen                             | 19 (49)  | 12 (26)  | 2.69 (1.08-6.68) | 2.78 (1.11-6.98) |
| House dust                         | 8 (21)   | 7 (15)   | 1.44 (0.47-4.40) | 1.43 (0.46-4.39) |
| Pets                               | 11 (28)  | 4 (9)    | 4.12 (1.19-14.3) | 4.22 (1.21-14.8) |
| Night cough                        | 19 (49)  | 18 (40)  | 1.43 (0.60-3.39) | 1.48 (0.60-3.67) |
| Hay fever                          | 23 (62)  | 19 (41)  | 2.33 (0.96-5.67) | 2.52 (1.00-6.31) |
| Eczema, atopic dermatitis          | 15 (38)  | 10 (22)  | 2.19 (0.84-5.68) | 2.31 (0.87-6.13) |
| <b>Clinical tests, n (%)</b>       |          |          |                  |                  |
| Skin Prick Test, positive          | 16 (41)  | 17 (37)  | 1.19 (0.49-2.85) | 1.20 (0.49-2.94) |
| FeNO test, positive                | 19 (49)  | 16 (35)  | 1.78 (0.74-4.27) | 1.77 (0.74-4.28) |
| Methacholine test, positive        | 28 (80)  | 31 (70)  | 1.68 (0.59-4.80) | 1.66 (0.58-4.77) |
| Mannitol test, positive            | 9 (20)   | 14 (38)  | 2.43 (0.91-6.54) | 2.53 (0.92-6.93) |
| Exercise test, positive            | 11 (35)  | 7 (16)   | 2.99 (1.00-8.89) | 3.20 (1.05-9.70) |
| Spirometry % pred. median(IQR)     |          |          |                  |                  |
| FEV1                               | 100 (16) | 101 (12) | 1.00 (0.97-1.03) | 1.00 (0.97-1.03) |
| FVC                                | 103 (15) | 102 (11) | 1.00 (0.97-1.04) | 1.01 (0.97-1.04) |

209 **IQR=inter quartile range** † In the last 12 months ‡ Wheeze is defined as having wheeze in the last 12 months §  
 210 Adjusted for age and sex  
 211

212 **Figure 1:** Associations between baseline factors and wheeze at follow up

213

214 **Table 4:** Associations between baseline factors and frequent wheeze at follow up

| Baseline factors                   | Frequent ‡                     |                                | Unadjusted<br>OR (95% CI) | Adjusted §<br>OR (95% CI) |
|------------------------------------|--------------------------------|--------------------------------|---------------------------|---------------------------|
|                                    | wheeze at<br>follow up<br>N=30 | wheeze at<br>follow up<br>N=55 |                           |                           |
| <b>Symptoms †, n(%)</b>            |                                |                                |                           |                           |
| Wheeze                             | 24 (80)                        | 37 (67)                        | 1.95 (0.68-5.60)          | 1.88 (0.62-5.68)          |
| More than 3 attacks of wheeze      | 12 (40)                        | 15 (27)                        | 1.78 (0.69-4.56)          | 1.74 (0.66-4.57)          |
| Exercise-induced wheeze            | 23 (77)                        | 31 (56)                        | 2.54 (0.94-6.91)          | 3.05 (1.07-8.67)          |
| Disturbed sleep due to wheeze      | 12 (40)                        | 16 (29)                        | 1.63 (0.64-4.13)          | 1.44 (0.53-3.87)          |
| Difficulty breathing due to wheeze | 10 (34)                        | 12 (22)                        | 1.84 (0.68-5.00)          | 2.10 (0.74-5.91)          |
| Wheeze with colds                  | 15 (50)                        | 21 (38)                        | 1.62 (0.66-3.98)          | 1.49 (0.57-3.86)          |
| Wheeze without colds               | 19 (63)                        | 29 (53)                        | 1.55 (0.62-3.85)          | 1.58 (0.61-4.05)          |
| Wheeze triggered by allergens      |                                |                                |                           |                           |
| Pollen                             | 13 (43)                        | 18 (33)                        | 1.57 (0.63-3.93)          | 1.50 (0.59-3.83)          |
| House dust                         | 3 (10)                         | 12 (22)                        | 0.40 (0.10-1.54)          | 0.40 (0.10-1.59)          |
| Pets                               | 9 (30)                         | 6 (11)                         | 3.50 (1.11-11.1)          | 3.79 (1.15-12.5)          |
| Night cough                        | 17 (57)                        | 20 (37)                        | 2.22 (0.90-5.52)          | 2.16 (0.82-5.67)          |
| Hay fever                          | 19 (66)                        | 23 (43)                        | 2.56 (1.00-6.53)          | 2.31 (0.88-6.00)          |
| Eczema, atopic dermatitis          | 10 (33)                        | 15 (28)                        | 1.30 (0.50-3.41)          | 1.19 (0.44-3.21)          |
| <b>Clinical tests, n(%)</b>        |                                |                                |                           |                           |
| Skin Prick Test, positive          | 13 (43)                        | 20 (36)                        | 1.34 (0.54-3.32)          | 1.32 (0.51-3.39)          |
| FeNO test, positive                | 13 (43)                        | 22 (40)                        | 1.15 (0.47-2.83)          | 1.27 (0.50-3.23)          |
| Methacholine test, positive        | 21 (75)                        | 38 (75)                        | 1.68 (0.59-4.80)          | 1.10 (0.37-3.25)          |
| Mannitol test, positive            | 10 (36)                        | 13 (24)                        | 1.75 (0.65-4.73)          | 1.93 (0.69-5.41)          |
| Exercise test, positive            | 8 (31)                         | 10 (20)                        | 1.78 (0.60-5.25)          | 1.96 (0.65-5.95)          |
| Spirometry % pred. median(IQR)     |                                |                                |                           |                           |
| FEV1                               | 100 (15)                       | 101 (13)                       | 1.00 (0.97-1.03)          | 1.00 (0.97-1.03)          |
| FVC                                | 106 (13)                       | 101 (13)                       | 1.01 (0.98-1.05)          | 1.01 (0.98-1.05)          |

215 **IQR=inter quartile range** † In the last 12 months ‡ Frequent wheeze is defined as having more than 3 attacks of  
216 wheeze in the last 12 months § Adjusted for age and sex  
217

## 218 **Discussion**

219 Among school-aged children referred to a respiratory outpatient clinic for evaluation of  
220 wheeze, cough, or dyspnoea, 46% reported wheeze seven years later. Reported exercise-  
221 induced wheeze and wheeze triggered by pets or pollen at baseline predicted wheeze at  
222 follow-up. Of the clinical tests, only a positive exercise challenge test predicted wheeze at  
223 follow-up, but no more strongly than reported exercise-induced wheeze.

224 A few studies have examined the prediction of prognosis by clinical testing, but ours is the  
225 only study to have done this for so many clinical tests in school-aged children referred to a  
226 respiratory outpatient clinic. We did not find an association between FEV1 at baseline and  
227 wheeze seven years later; previous studies have reported contradictory findings. Both the  
228 CAMP cohort of 909 children aged 5-12 years with diagnosed asthma and another Dutch  
229 clinical cohort study of 5-14 year-old children diagnosed with asthma found that asthma  
230 persistence at ages 15-20 and 32-42, respectively, was associated with decreased FEV1 at  
231 school-age.(8, 9) In contrast, the population-based Tasmanian cohort did not find an  
232 association between FEV1 at age 7 and wheeze persistence at age 29-32.(12, 15) This  
233 could be because children with wheeze from population-based cohorts might have milder  
234 asthma than those in clinical studies. Our findings are not directly comparable with those of  
235 other studies that studied younger children, reported test results differently, or included  
236 healthy children.

237 Our observation that frequent attacks of wheeze at school age predicted wheeze persistence  
238 seven years later is in line with findings from the Melbourne and Tasmanian cohorts.(10, 11)  
239 In contrast to their findings, we found no significant association between either eczema or  
240 hay fever at baseline and wheeze persistence. This could be because those cohorts used  
241 different outcomes—severe wheeze and atopic asthma, respectively—or simply because we  
242 had low numbers and limited power.

243 A possible limitation of our study was that the bronchial provocation tests were done within a  
244 short period of time. This could have influenced the methacholine test result, which was  
245 performed after the exercise test on the same day and was positive in 76% of the children.  
246 Most likely the bronchial provocation test by mannitol was not influenced by the short time  
247 interval. We assured an appropriate interval of at least 24 hours without a change in  
248 respiratory health or medication in this time interval. A second limitation was the small  
249 sample size, which limited statistical power and did not allow us to perform a multivariable  
250 analysis including all symptoms and test results simultaneously.

251 The main strength of our study is its clinical design, which reflects the typical mix of patients  
252 in a paediatric outpatient clinic. All children were first-time referrals to the paediatric  
253 respiratory clinic for evaluation of possible asthma. Therefore, the study population is  
254 representative of daily clinical work, in contrast to many clinical studies that selectively  
255 include well-defined moderate to severe asthmatics and leave out patients with unclear  
256 degrees of airway reactivity. Our study also profited from a very detailed baseline  
257 examination. Children in the study had an extensive array of examinations for lung function,  
258 BPT and allergy, which allowed us to assess the contribution of clinical tests in predicting  
259 long-term wheeze in addition to reported symptoms among those referred for evaluation of  
260 possible asthma.

261

## 262 **Conclusion**

263 This study is an initial step towards finding out whether clinical tests can predict wheeze later  
264 in life. Though clinical tests might be important for asthma diagnosis, our results suggest that  
265 they do not strongly predict prognosis of wheeze. In contrast, our data underline the  
266 importance of a detailed history, as school-age children reporting exercise-related wheeze  
267 and wheeze triggered by allergens were at higher risk and thus might profit from more  
268 frequent follow-up.

269

## 270 **General acknowledgements**

271 We thank all participants and lab technicians of the pulmonology department in the children's  
272 hospitals in Basel and St. Gallen for their assistance in our study, Marie-Pierre Strippoli  
273 (ISPM, Bern) for her work on the study at baseline, Bettina Meier (ISPM, Bern) for entering  
274 the follow-up questionnaires into the database and sending the participation reminders. We  
275 thank Christopher Ritter (ISPM, Bern) for his editorial assistance and Niels Hagenbuch  
276 (ISPM, Bern) for his statistical support.

277

### 278 **Author contributions**

279 Claudia Kuehni and Jürg Barben conceptualised and designed the study. Daniel Trachsel  
280 and Jürg Barben supervised data collection. Carmen de Jong analysed the data and drafted  
281 the manuscript. Eva Pedersen and Myrona Goutaki supported the statistical analysis and  
282 gave input for interpretation of the data. All authors critically revised the manuscript and  
283 approved the final manuscript as submitted.

284

285

## 286 References

287

- 288 1. Braig S, Brandt S, Wabitsch M, Florath I, Brenner H, Rothenbacher D, et al. Age-specific  
289 influence of wheezing phenotypes on pre-adolescent and adolescent health-related quality of life.  
290 *Pediatr Allergy and Immunol.* 2014;25(8):781-7.
- 291 2. Jurca M, Pescatore AM, Goutaki M, Spycher BD, Beardsmore CS, Kuehni CE. Age-related  
292 changes in childhood wheezing characteristics: A whole population study. *Pediatr Pulmonol.*  
293 2017;52(10):1250-9.
- 294 3. Stevens CA, Turner D, Kuehni CE, Couriel JM, Silverman M. The economic impact of preschool  
295 asthma and wheeze. *Eur Respir J.* 2003;21(6):1000-6.
- 296 4. Fuchs O, Bahmer T, Rabe KF, von Mutius E. Asthma transition from childhood into adulthood.  
297 *Lancet Respir Med.* 2017;5(3):224-34.
- 298 5. Spycher BD. Temporal stability of multiple trigger and episodic viral wheeze in early childhood.  
299 *Eur Respir J.* 2017.
- 300 6. van Wonderen KE, Geskus RB, van Aalderen WM, Mohrs J, Bindels PJ, van der Mark LB, et al.  
301 Stability and predictiveness of multiple trigger and episodic viral wheeze in preschoolers. *Clin Exp*  
302 *Allergy.* 2016;46(6):837-47.
- 303 7. Sears MR. Predicting asthma outcomes. *J Allergy Clin Immunology.* 2015;136(4):829-36.
- 304 8. Vonk JM, Postma DS, Boezen HM, Grol MH, Schouten JP, Koeter GH, et al. Childhood factors  
305 associated with asthma remission after 30 year follow up. *Thorax.* 2004;59(11):925-9.
- 306 9. Covar RA, Strunk R, Zeiger RS, Wilson LA, Liu AH, Weiss S, et al. Predictors of remitting,  
307 periodic, and persistent childhood asthma. *J Allergy Clin Immunol.* 2010;125(2):359-66.e3.
- 308 10. Wolfe R, Carlin JB, Oswald H, Olinsky A, Phelan PD, Robertson CF. Association between allergy  
309 and asthma from childhood to middle adulthood in an Australian cohort study. *Am J Respir Crit Care*  
310 *Med.* 2000;162(6):2177-81.
- 311 11. Martin PE, Matheson MC, Gurrin L, Burgess JA, Osborne N, Lowe AJ, et al. Childhood eczema  
312 and rhinitis predict atopic but not nonatopic adult asthma: a prospective cohort study over 4 decades.  
313 *J Allergy Clin Immunol.* 2011;127(6):1473-9.e1.
- 314 12. Sears MR, Greene JM, Willan AR, Wiecek EM, Taylor DR, Flannery EM, et al. A longitudinal,  
315 population-based, cohort study of childhood asthma followed to adulthood. *N Engl J Med.*  
316 2003;349(15):1414-22.
- 317 13. Andersson M, Hedman L, Bjerg A, Forsberg B, Lundback B, Ronmark E. Remission and  
318 persistence of asthma followed from 7 to 19 years of age. *Pediatrics.* 2013;132(2):e435-42.
- 319 14. Burgess JA, Walters EH, Byrnes GB, Matheson MC, Jenkins MA, Wharton CL, et al. Childhood  
320 allergic rhinitis predicts asthma incidence and persistence to middle age: a longitudinal study. *J Allergy*  
321 *Clin Immunol.* 2007;120(4):863-9.
- 322 15. Jenkins MA, Hopper JL, Bowes G, Carlin JB, Flander LB, Giles GG. Factors in childhood as  
323 predictors of asthma in adult life. *BMJ.* 1994;309(6947):90-3.
- 324 16. Oswald H, Phelan PD, Lanigan A, Hibbert M, Bowes G, Olinsky A. Outcome of childhood asthma  
325 in mid-adult life. *BMJ.* 1994;309(6947):95-6.
- 326 17. Barben J ea. Mannitol dry powder challenge in comparison with exercise testing in children.  
327 *Pediatr Pulmonol.* 2011;46:842-8.
- 328 18. Barben J ea. Effect of Mannitol dry powder challenge on exhaled nitric oxide in children. *PLoS*  
329 *One.* 2013;8(1).
- 330 19. Asher MI ea. International study of asthma and allergies in childhood (ISAAC): rationale and  
331 methods. *Eur Respir J.* 1995;8:483-91.
- 332 20. Crapo RO, Casaburi R, Coates AL, Enright PL, Hankinson JL, Irvin CG, et al. Guidelines for  
333 methacholine and exercise challenge testing-1999. . *Am J Respir Crit Care Med.* 2000;161(1):309-29.
- 334 21. Zapletal A SM, Paul T. Lung function in children and adolescents. Methods, reference values.  
335 *Prog Respir Res.* 1987;22:1-220.

336 22. Braun-Fahrlaender C WB, et al. Prävalenz und Risikofaktoren einer allergischen  
337 Sensibilisierung bei Schulkindern in der Schweiz. Allergologie. 1999;22:54-64.

338

339 **Supplementary data**

340 **Table S1.** Comparison of characteristics of the children included in the follow-up study and  
341 the children that did not take part in the follow-up study

342

343 **Table S2** Association between reported exercise-induced wheeze and exercise test result at  
344 baseline N=76

345

346 **Figure S1:** Association between reported exercise-induced wheeze and the fall of FEV1%  
347 predicted during exercise testing at baseline

348

**Figure 1:** Associations between baseline factors and wheeze at follow up

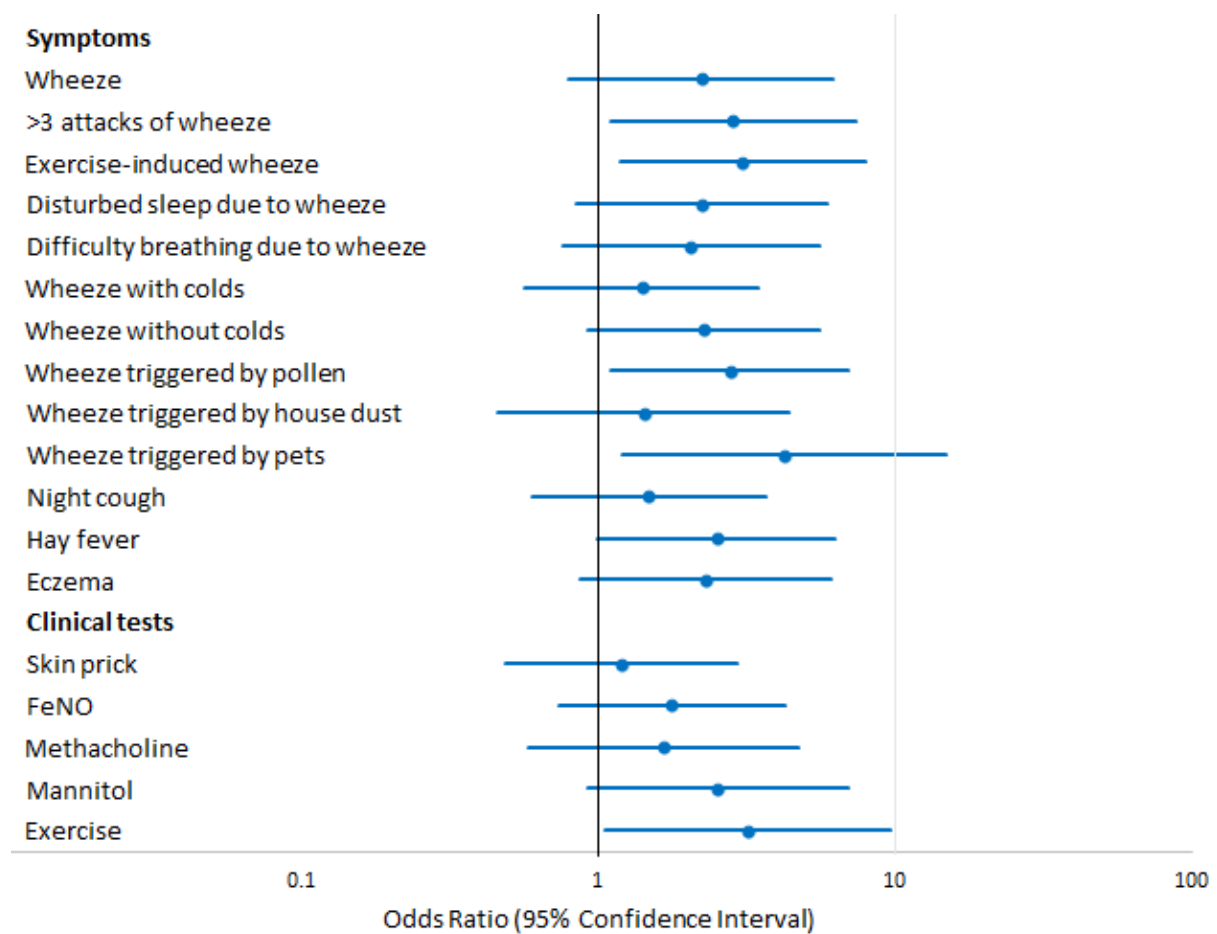

Source: http://biorxiv.org/content/10.1101/529537v1.full.pdf
